# Supplementary material
Source: publisher site journal article supplement (https://www.dovepress.com/get_supplementary_file.php?f=357112.docx)
Supplement: Supplementary file 1 [file get_supplementary_file.php]

**Supplementary Table 1:** Procedure and diagnosis codes

| ***Procedure*** | ***Procedure Code*** |
| --- | --- |
| Primary Total Knee Arthroplasty | Replacement of knee joint with synthetic substitute, open approach: ICD-10-PCS 0SRD0J9, 0SRD0JA, 0SRD0JZ, 0SRC0J9, 0SRC0JA, or 0SRC0JZ  AND  Major joint replacement or re-attachment of lower extremity: DRG 469 or 470 |
| Robotic-Arm Assisted TKA | Pre-operative CT scan: CPT 73700, 73701, or 73702  AND  Robotic arm-assisted procedure: ICD-10-PCS 8E0Y0CZ |
| ***Complications*** | ***Procedure/Diagnosis Code*** |
| Bleeding | ICD-10 M96.830, M96.840, L76.22, L76.32, T88.8XXA, T88.8XXD, T88.8XXS |
| Seroma | ICD-10 L76.34, M96.842 |
| Instability/Malalignment/ Patello-femoral Dislocation/ Tibio-femoral Dislocation | ICD-10 T84.022A, T84.022D, T84.022S, T84.023A, T84.023D, T84.023S |
| Periprosthetic Fracture | ICD-10 M97.11XA, M97.11XD, M97.11XS, M97.12XA, M97.12XD, M97.12XS |
| Osteolysis | ICD-10 T84.052A, T84.052D, T84.052S, T84.053A, T84.053D, T84.053S |
| Bearing Surface Wear | ICD-10 T84.062A, T84.062D, T84.062S, T84.063A, T84.063D, T84.063S |
| Wound Complication | ICD-10 T81.500A, T81.500D, T81.500S, T81.510A, T81.510D, T81.510S, T81.520A, T81.520D, T81.520S, T81.530A, T81.530D, T81.530S, T81.590A, T81.590D, T81.590S, T81.60XA, T81.60XD, T81.60XS, T81.69XA, T81.69XD, T81.69XS, T81.82XA, T81.82XD, T81.82XS, T81.89XA, T81.89XD, T81.89XS, L76.82, T81.9XXA, T81.9XXD, T81.9XXS, T84.82XA, T84.82XD, T84.82XS, T84.83XA, T84.83XD, T84.83XS, T84.84XA, T84.84XD, T84.84XS, T84.85XA, T84.85XD, T84.85XS, T84.86XA, T84.86XD, T84.86XS, T84.89XA, T84.89XD, T84.89XS, T84.092A, T84.092D, T84.092S, T84.093A, T84.093D, T84.093S, T84.9XXA, T84.9XXD, T84.9XXS |
| Infection | ICD-10 T84.53XA, T84.53XD, T84.53XA, T84.54XA, T84.54XD, T84.54XS, T84.50XA, T84.50XD, T84.50XS, T81.40XA, T81.40XD, T81.40XS, T81.41XA, T81.41XD, T81.41XS, T81.42XA, T81.42XD, T81.42XS, T81.43XA, T81.43XD, T81.43XS, T81.44XA, T81.44XD, T81.44XS, T81.49XA, T81.49XD, T81.49XS |
| Implant Loosening | ICD-10 T84.032A, T84.032D, T84.032S, T84.033A, T84.033D, T84.033S |
| Implant Fracture or Tibial Insert Dissociation | ICD-10 T84.012A, T84.012D, T84.012S, T84.013A, T84.013D, T84.013S |
| Revision | ICD-10-PCS 0SPC0JZ, 0SPD0JZ, 0SRC0J9, 0SRC0JA, 0SRC0JZ, 0SRC069, 0SRC06A, 0SRC06Z, 0SRD0J9, 0SRD0JA, 0SRD0JZ, 0SRD069, 0SRD06A, 0SRD06Z, 0SWC0JC, 0SWCXJC, 0SWC4JC, 0SWD0JC, 0SWDXJC, 0SWD4JC, 0SWT0JZ, 0SWTXJZ, 0SWT4JZ, 0SWU0JZ, 0SWUXJZ, 0SWU4JZ, 0SWV0JZ, 0SWVXJZ, 0SWV4JZ, 0SWW0JZ, 0SWWXJZ, 0SWW4JZ, 0SWC0JZ, 0SWCXJZ, 0SWC4JZ, 0SWD0JZ, 0SWDXJZ, 0SWD4JZ, 0SWC09Z, 0SWD09Z, 0SWC08Z, 0SWCX8Z, 0SWC38Z, 0SWC48Z, 0SWD08Z, 0SWDX8Z, 0SWD38Z, 0SWD48Z |
| Disruption/Wound Dehiscence | ICD-10 T81.30XA, T81.30XD, T81.30XS, T81.32XA, T81.32XD, T81.32XS, T81.31XA, T81.31XD, T81.31XS |
| Embolism | ICD-10 T84.81XA, T84.81XD, T84.81XS |
| Stiffness | ICD-10 M25.66, M25.661, M25.662, M25.669 |
| Neural deficit | ICD-10 G97.81, G97.82, S74, S84 |
| Vascular injury | ICD-10 T14.8, T81.718, T81.718A, T81.718D, T81.718S, T81.719, T81.719A, T81.719D, T81.719S, T81.72, T81.72XA, T81.72XD, T81.72XS, S75, S85 |
| Medial collateral ligament injury | ICD-10 S83.41 |
| Extensor mechanism disruption | ICD-10 M66.25; M66.26 |
| *Comorbidities* | *ICD-10-CM Diagnosis code* |
| Chronic obstructive pulmonary disease | J41.0, J41.1, J41.8, J42, J43.0, J43.1, J43.2, J43.8, J43.9, J44.0, J44.1, J44.9, J98.2, J98.3 |
| Coronary artery disease | I25.1, 125.10, 125.110, 125.111, 125.118, 125.119, 125.70, 125.71, 125.75, 125.79 |
| Diabetes | E08 to E11, E13 |
| Hypertension | I10 to I13, I15 to I16 |
| Obesity | E66.01, E66.1, E66.2, E66.8, E66.9, Z68.30 to Z68.39, Z68.41 to Z68.45 |
| Smoking | Z72.0, F17.20, F17.21, F17.22, F17.23 |

**Supplementary Table 2:** Characteristics of the propensity-score matched RATKA and MTKA cohorts

| **Patient characteristics** | | **RATKA (n=742)** | **MTKA (n=3,710)** |
| --- | --- | --- | --- |
| Women | | 55.4% | 54.0% |
| Age (years) | 18-34 | 0.3% | 0.2% |
| 35-44 | 2.8% | 2.9% |
| 45-54 | 30.5% | 30.4% |
| 55-64 | 66.4% | 66.5% |
| Census region | Midwest, East Central | 15.9% | 16.5% |
| Midwest, West Central | 3.9% | 3.7% |
| Northeast, Middle Atlantic | 16.4% | 16.1% |
| Northeast, New England | 6.3% | 5.7% |
| South, Atlantic | 12.7% | 12.7% |
| South, East Central | 10.9% | 11.2% |
| South, West Central | 20.8% | 21.4% |
| West, Mountain | 5.9% | 6.0% |
| West, Pacific | 7.1% | 6.7% |
| Chronic obstructive pulmonary disease | | 3.5% | 2.3% |
| Coronary artery disease | | 7.3% | 5.4% |
| Diabetes | | 18.7% | 16.6% |
| Hypertension | | 57.4% | 56.8% |
| Obesity | | 39.2% | 40.9% |
| Smoking | | 7.4% | 6.4% |
